# Supplementary material for: Natural diversity in the model legume Medicago truncatula allows identifying distinct genetic mechanisms conferring partial resistance to Verticillium wilt
Source: PubMed Central journal article supplement — J Exp Bot. 2012 Dec 3;64(1):317–32. doi: 10.1093/jxb/ers337 (PMC3528038; doi:10.1093/jxb/ers337), 2012-12-03
Supplement: supp_ers337_jexbot088633_file001.pdf [file supp_ers337_jexbot088633_file001.pdf]

Cécile Ben, Maoulida Toueni, Sara Montanari, Marie-Claire Tardin, Magalie Fervel, Azam Negahi, Laure Saint-Pierre, Guillaume Mathieu, Marie-Christine Gras, Dominique Noël, Jean-Marie Prospéri, Marie-Laure Pilet-Nayel, Alain Baranger, Thierry Hugué, Bernadette Julier, Martina Rickauer, Laurent Gentzbittel

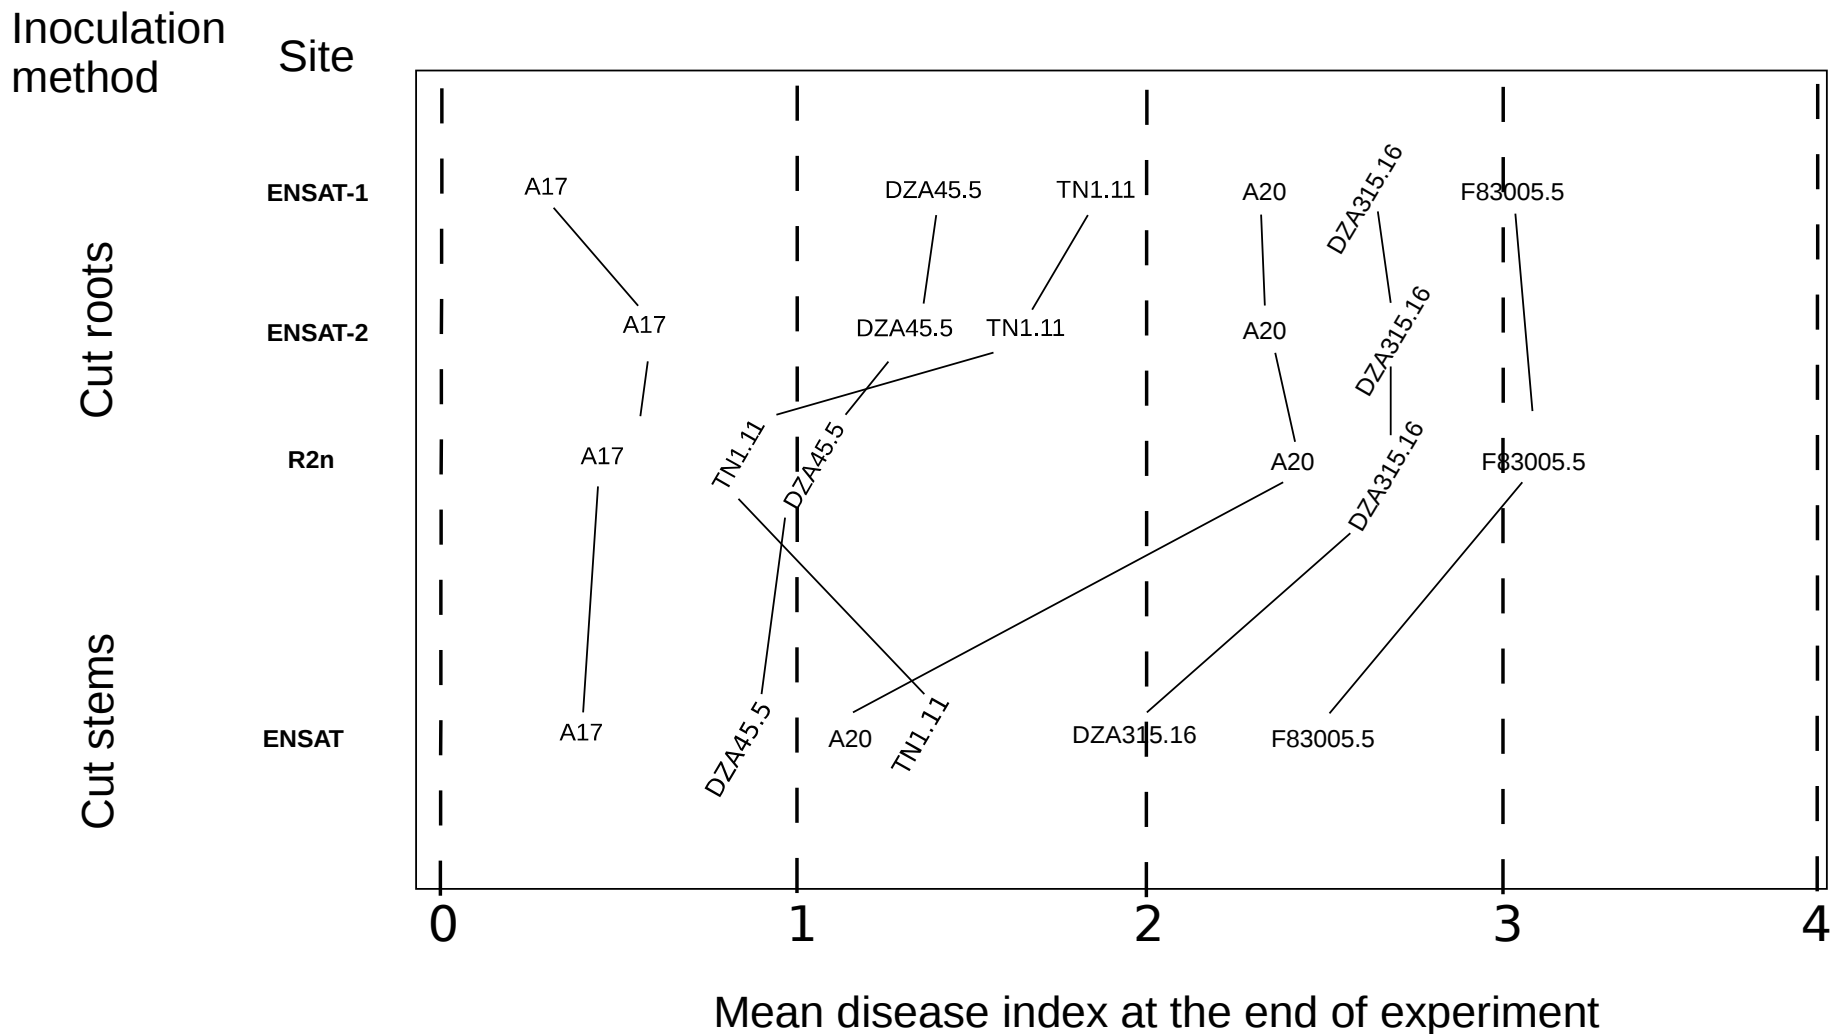

**Figure S1.** Comparisons of the quantitative resistance levels of six *Medicago truncatula* lines depending on inoculation method with *Verticillium albo-atrum*. The widely used tolerance assay in *M. sativa* based on infection after stem cuttings ('Cut stems' inoculation method; Molinero- Demilly et al., 2007) is compared to the one based on infection after roots cuttings in Jiffy pots ('Cut roots' inoculation method). The new inoculation method based on cut roots was tested at three different sites. *M. truncatula* accessions are drawn at their corresponding average score within each site, and lines allow easy comparisons of scores ranges between environments for each accession. Fifteen plants per line were inoculated for cut stems inoculation method, 12 to 15 plants per line were used for cut roots inoculation method.

**A**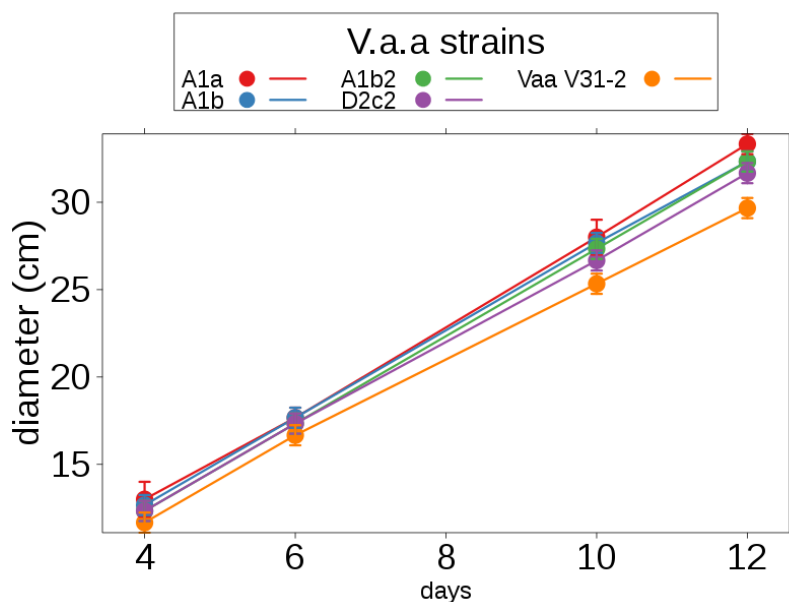**B**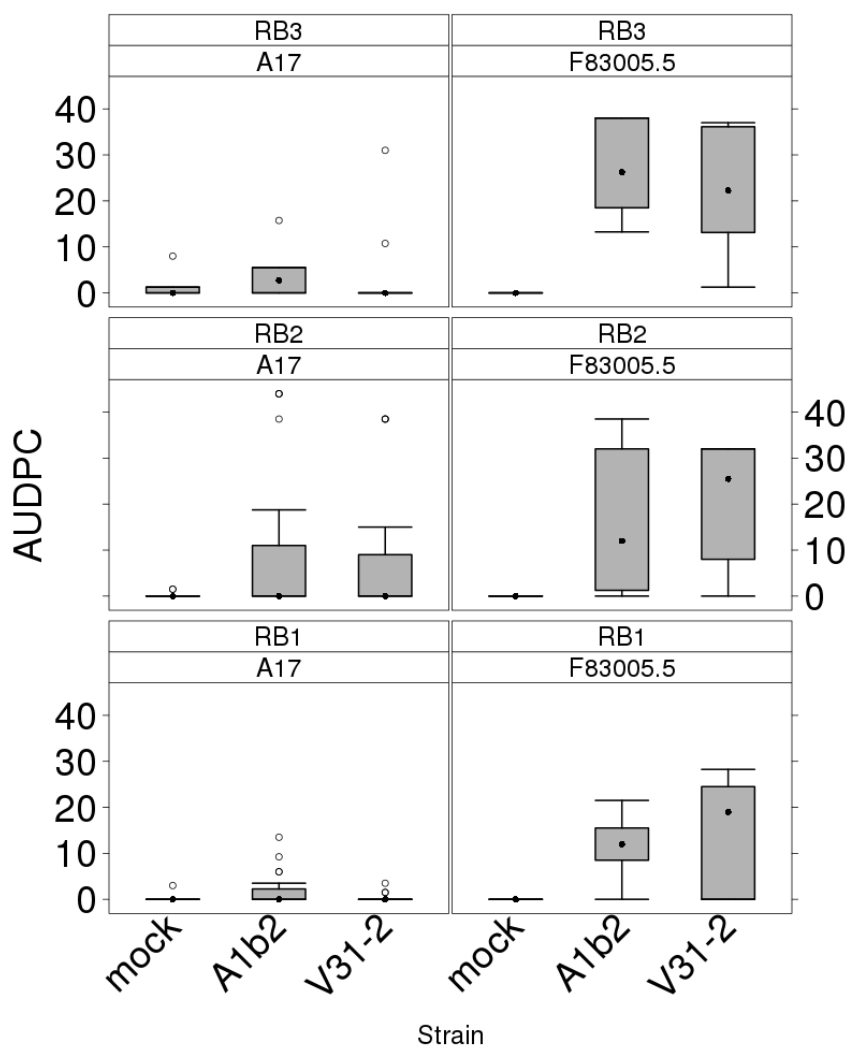

**Fig. S2. Analysis of the growth and aggressiveness of four monosporic isolates of *V. albo-atrum* expressing the Green Fluorescent Protein gene in comparison to the wild-type strain V31-2.**

**A** Radial growth on PDA medium was determined for 12 days. Data are means ( $\pm$  SD) of three independent experiments **B** Aggressiveness of the A1b2 GFP-expressing strain and corresponding wild strain V31-2 as assessed through AUDPC in the susceptible *M. truncatula* line F83005.5 or resistant line Jemalong-A17, following root inoculation in hydroponic culture. Data were obtained from 3 independent experiments (RB1, RB2, RB3).

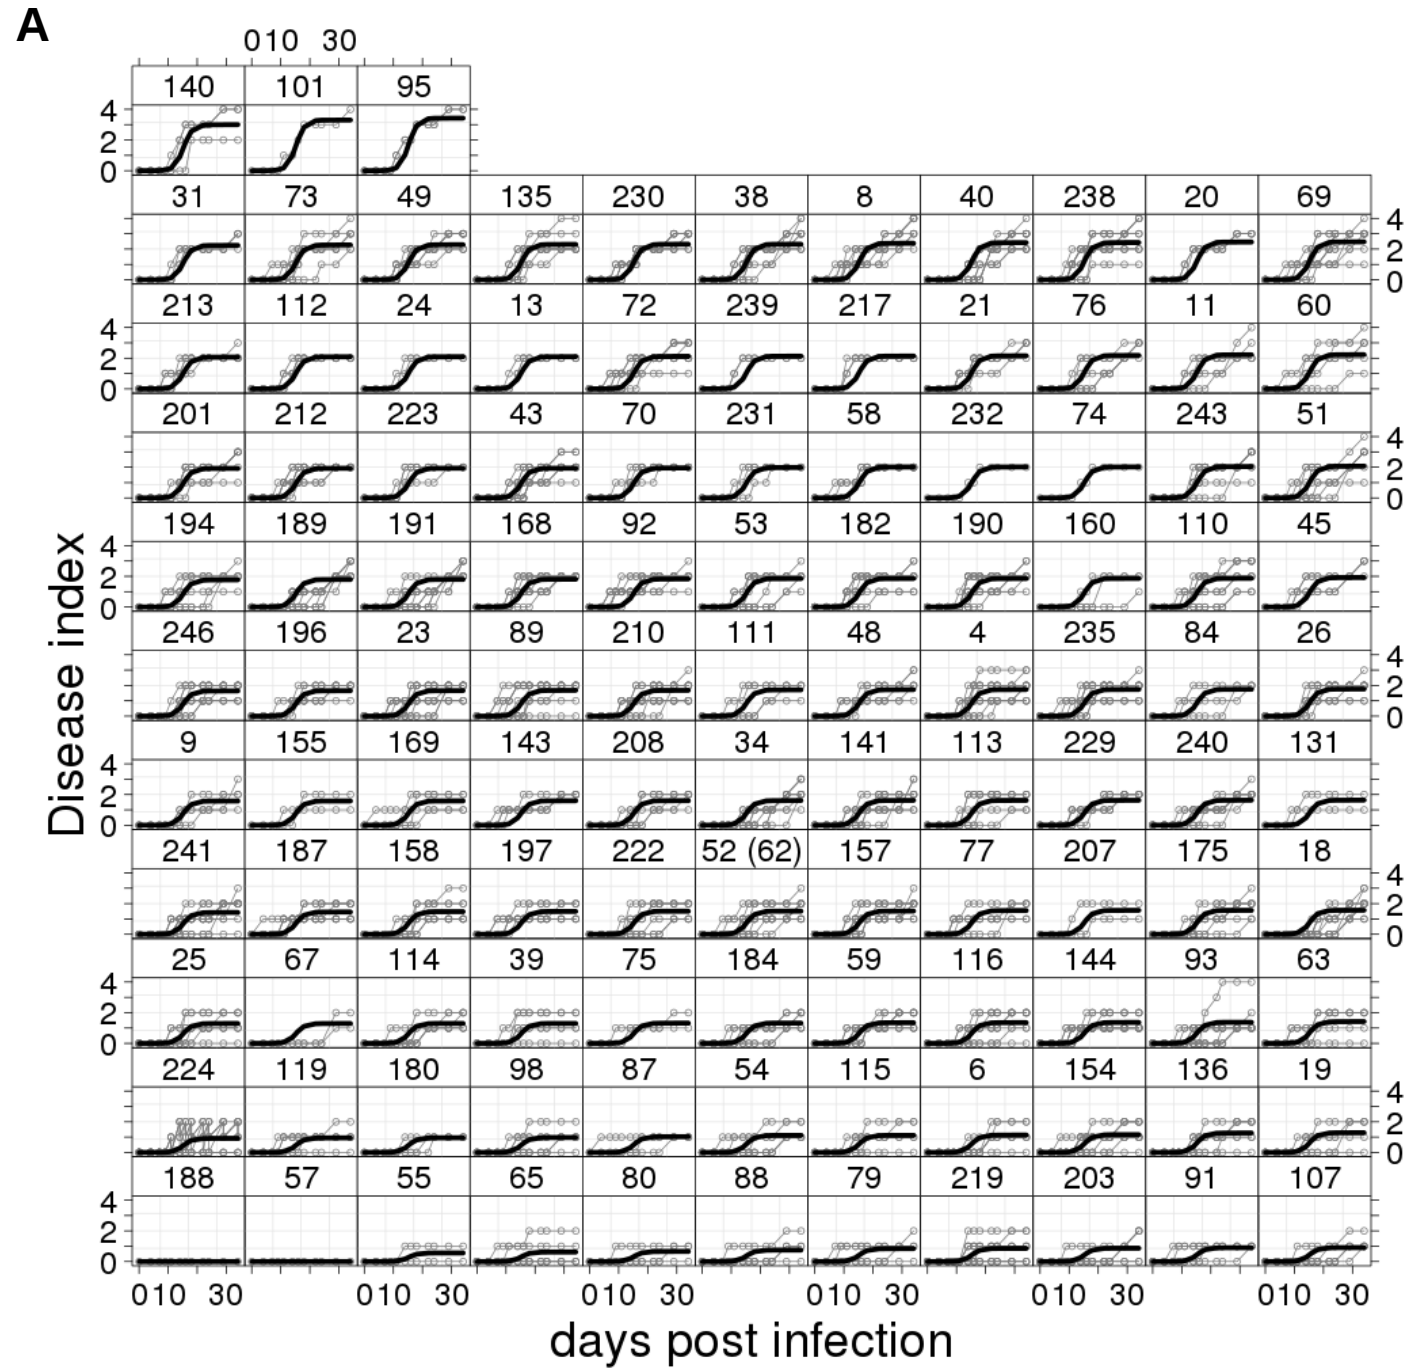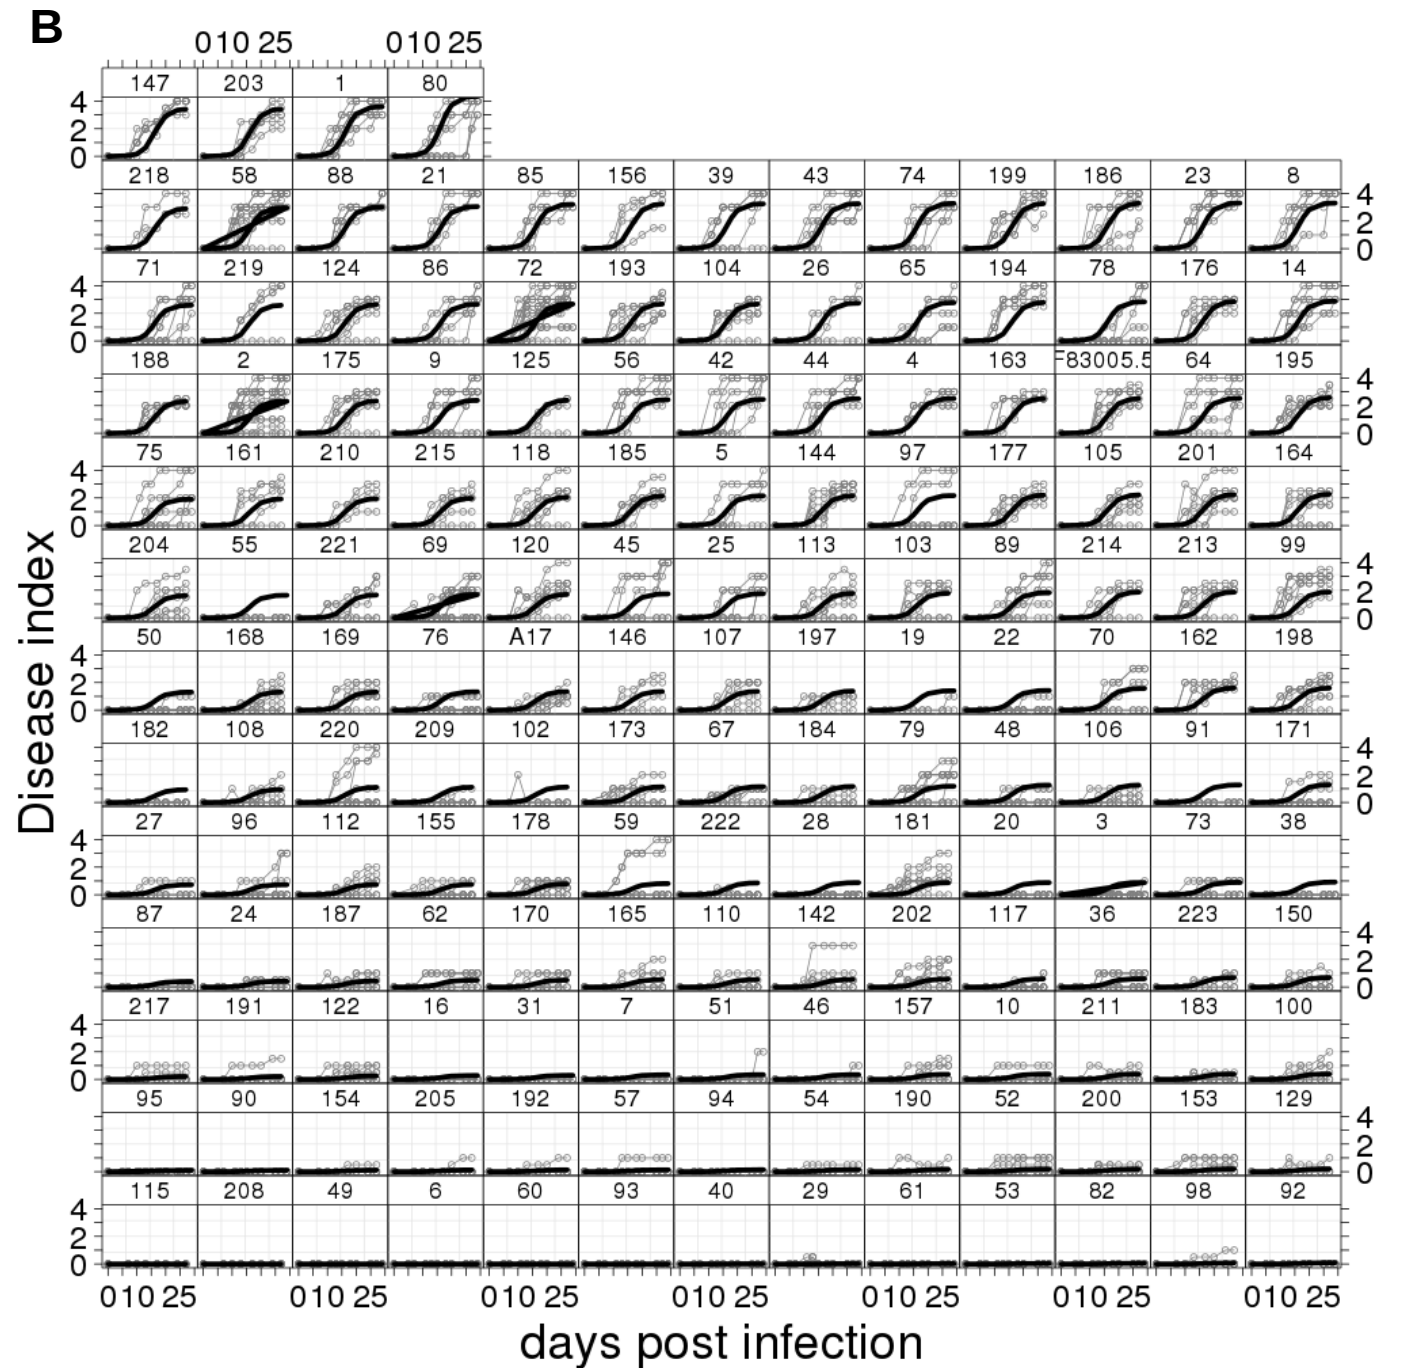

**Fig. S3.** Example of model fitting for wilting symptoms in 113 LR4 RILs at R2N site (**A**) and 158 LR5 RILs at ENSAT site (**B**). RIL genotypes are ordered by increasing maximum disease index, from bottom left to top right. For LR5, the parental genotypes Jemalong-A17 and F83005.5 are included.

Maximum disease index

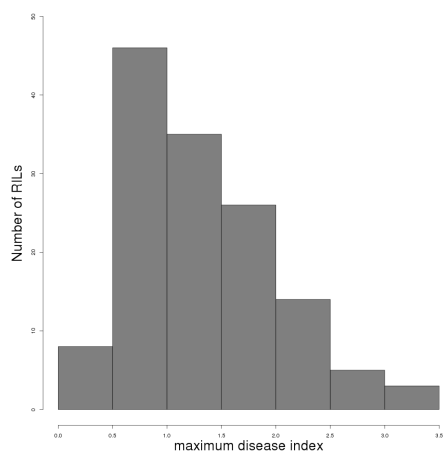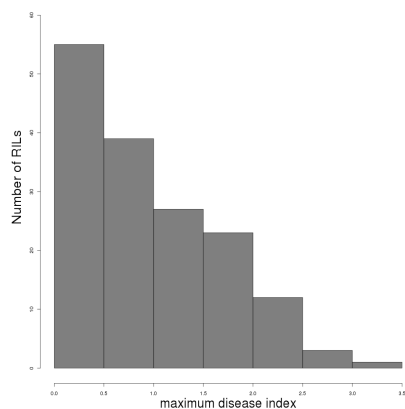

AUDPC

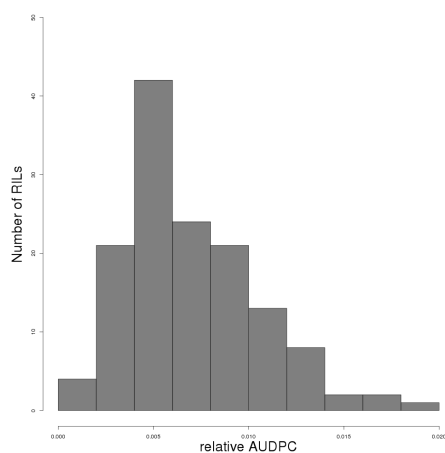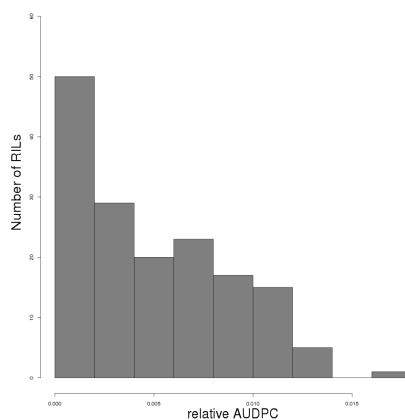

Death percentage

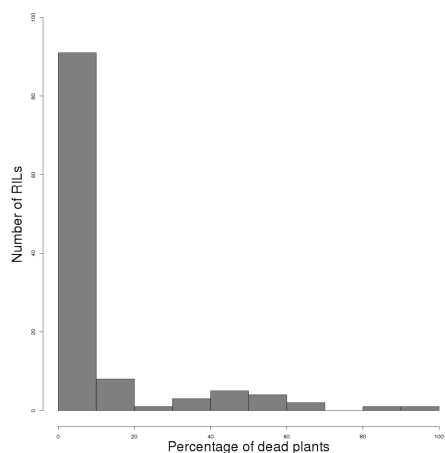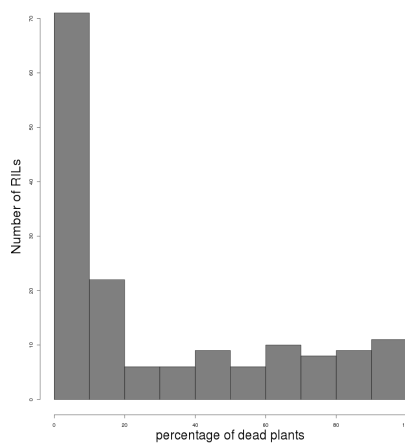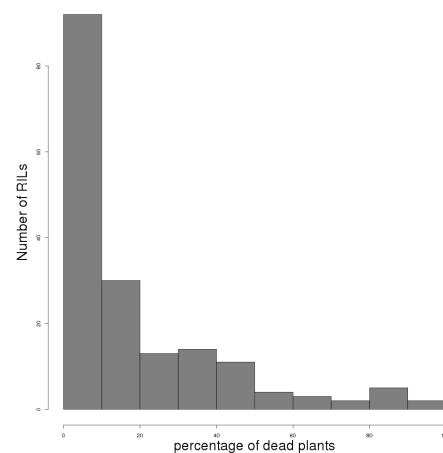

LR4

LR5

LR3

Fig. S4. Distribution of disease evaluation parameters in LR3, LR4 and LR5 RILs upon infection with *V. albo-atrum* V31-2.

**A**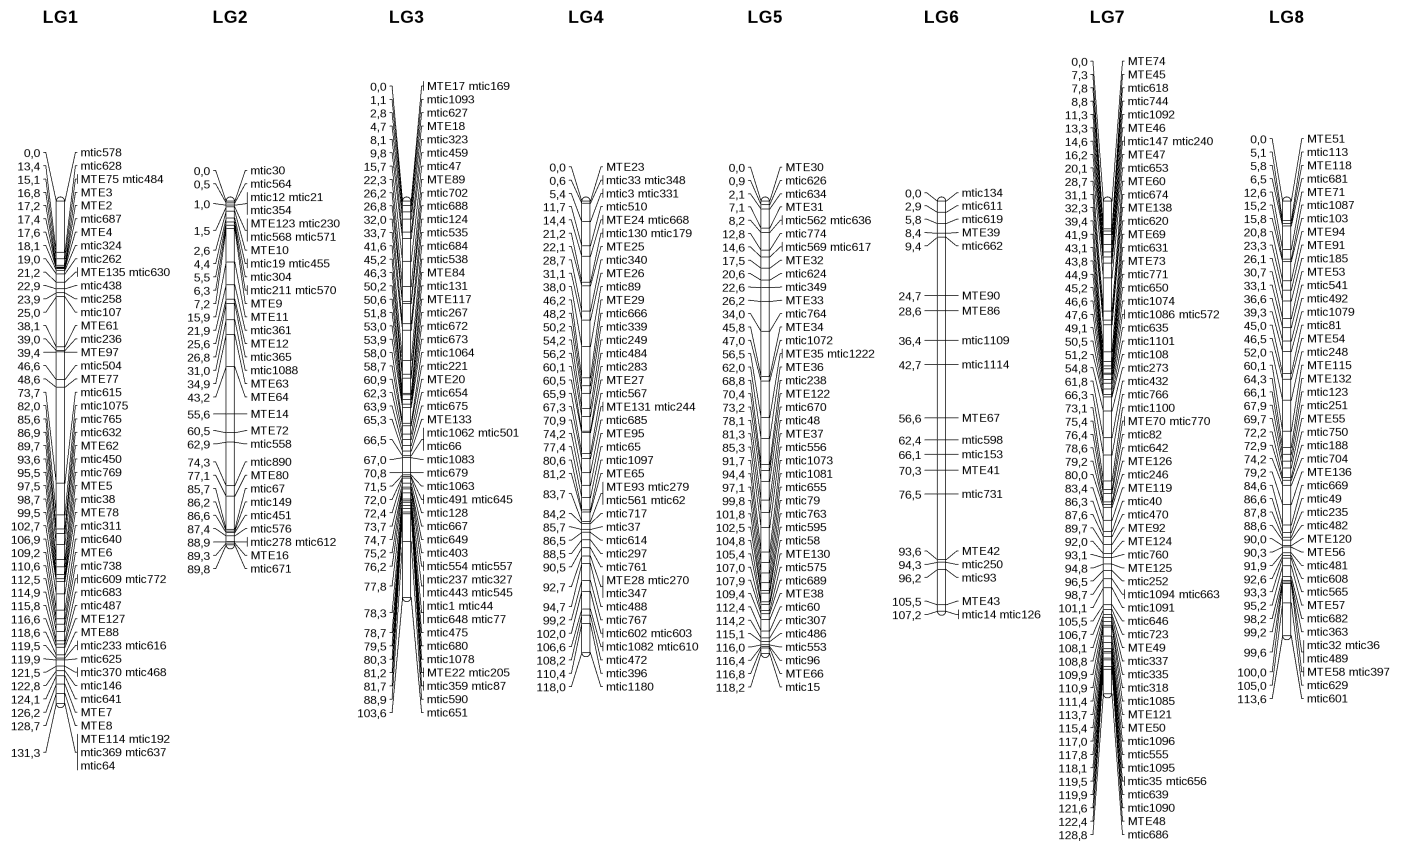**B**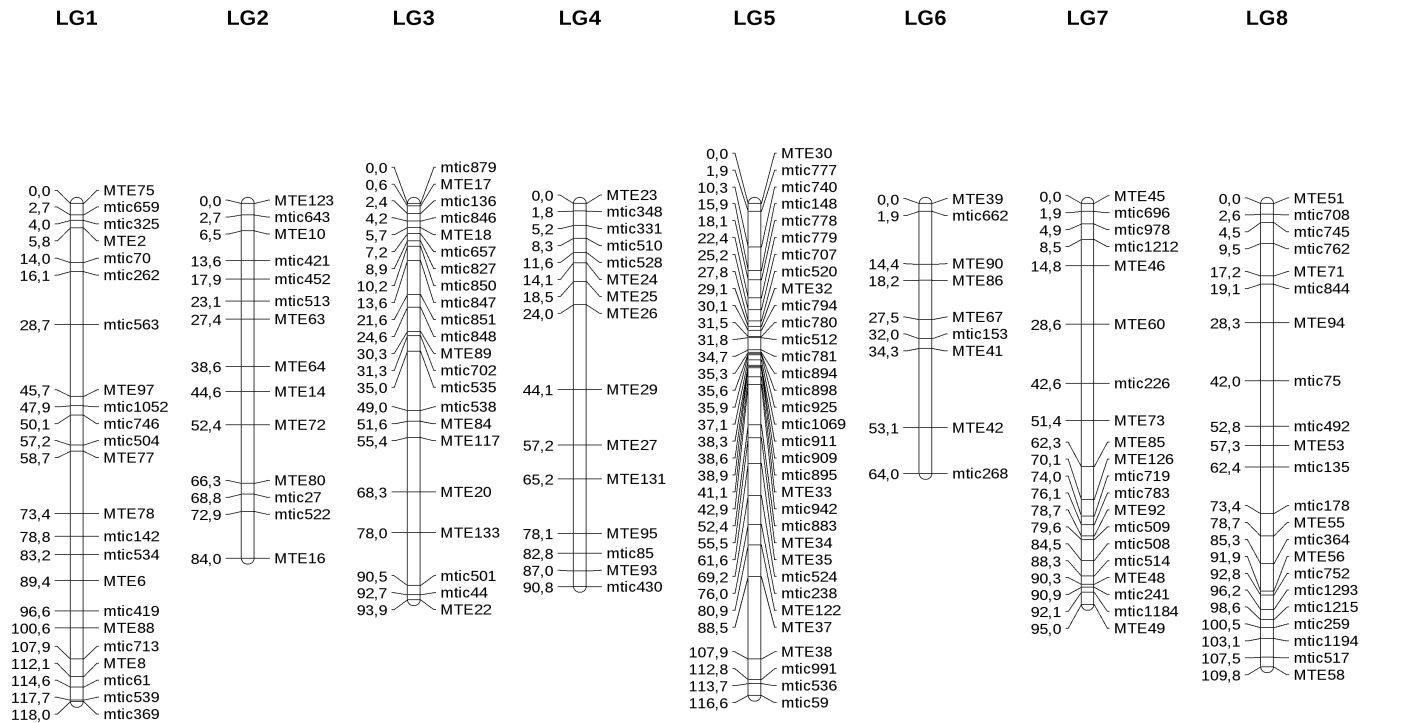

**Fig. S5.** Dense genetic maps for (A) A17 X DZA315.16 (LR4) and (B) A17 X F83005.5 (LR5) RILs populations of *Medicago truncatula*

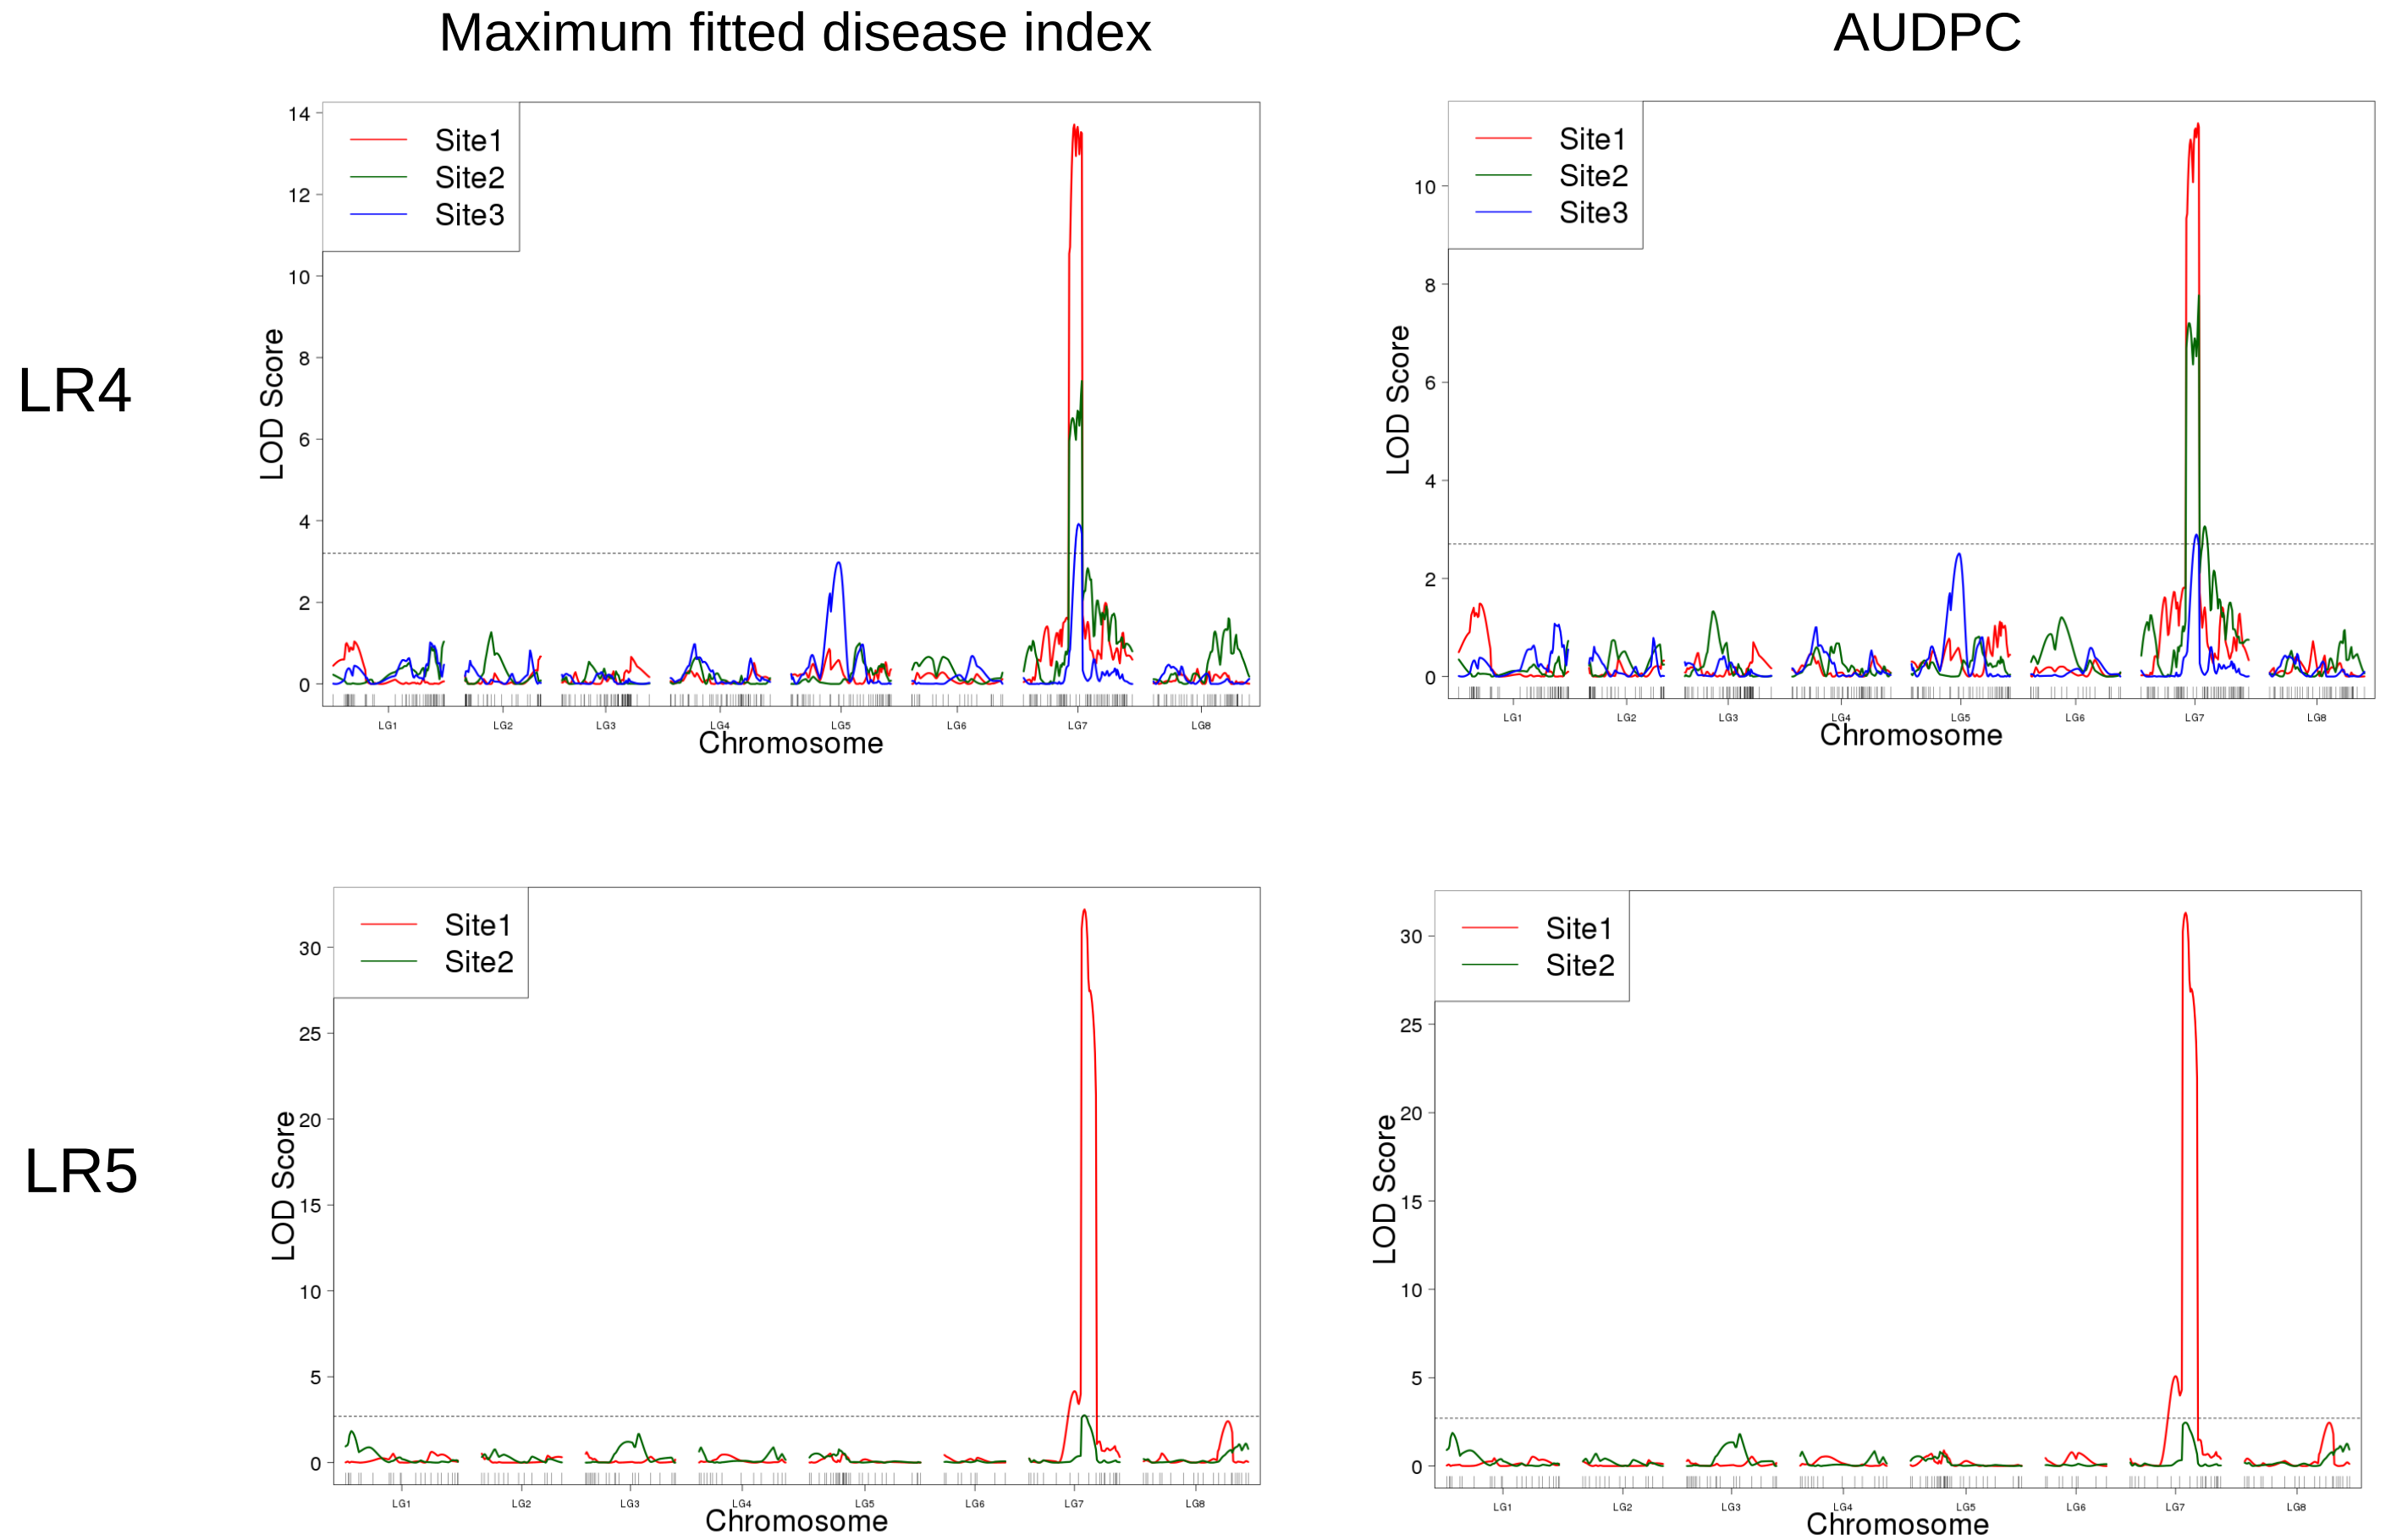

**Fig. S6. Whole-genome scans for QTL detection for *Verticillium* resistance assessed through maximum disease index (MDI) and AUDPC parameters in LR4 and LR5 populations, for each site.**

Log-likelihood (LOD) score for MDI and AUDPC, as identified by Multiple QTL Mapping, are plotted against the whole-genome of *Medicago truncatula* for LR5 and LR4 RIL populations. Significance of QTL is indicated by a LOD score above the threshold values, determined by permutation analysis at the genome-wide significance level of 0.05.



C

Functional domain A

|                 |     |                               |    |
|-----------------|-----|-------------------------------|----|
|                 | Ve1 | MKMMATLYFLWLLLIPSFQILSGYHIFLV | 29 |
| Medtr4g017370.1 | ..  | MRAHLTFL.LFLIPFSLINSSSNIFLV   |    |
| Medtr4g017350.1 | ..  | MRAHIVFL.LFFIPFSLIISSSNKFLV   |    |
| Medtr4g017280.1 | ..  | MIAHIIFW.LFLIPFSIINSSSNFVV    |    |
| Medtr5g046350.1 | ..  | MRAHIIF.WLFFMLFSSINSSTNNFLL   |    |
| GbVe            | MM  | ISPFSWIFFNAFLVAAFFTI...HLVLV  |    |

Functional domain B

|                 |     |                                    |    |
|-----------------|-----|------------------------------------|----|
|                 | Ve1 | SSQCLDDQKSLLEQFKGSQYDSTLSKKAkWND   | 63 |
| Medtr4g017370.1 |     | NGYCQGHERSLLEHLKNSLIFNPAKSSKLVNWNQ |    |
| Medtr4g017350.1 |     | NGYCHGHEHSLLQLKNSLIFNPTKSSKLVHWNQ  |    |
| Medtr4g017280.1 |     | NGYCHGHQRSLLQLKNNLIFNSEISSKLVHWKQ  |    |
| Medtr5g046350.1 |     | NGNCRGHQRAVLLQLKNNLIFNPEKSSKLVHWNQ |    |
| GbVe            |     | SGQCQRDQGQLLELKSS..FNSTSLGKLVQKWNQ |    |

|                 |     |                                      |    |
|-----------------|-----|--------------------------------------|----|
|                 | Ve1 | MTSECCNWNQVTCNLFGHVIALELDDETLSSGIE   | 97 |
| Medtr4g017370.1 |     | NDDCCQWNGVTC.IEGHVTALELDSHESLSSGGLN  |    |
| Medtr4g017350.1 |     | SDDCCQWHGVTC.KQGHVTVLELDSQESLSSGGLN  |    |
| Medtr4g017280.1 |     | SEHDCCQWDGVTC.KDGHVTALELDSQESLSSGGLN |    |
| Medtr5g046350.1 |     | SEYDCCKWHGVTC.DGHVTALELDSQESLSSGGLN  |    |
| GbVe            |     | .TTDCCFWDGVTCDASGRVIGLELDSNQSLSGAID  |    |

|                 |     |                             |     |
|-----------------|-----|-----------------------------|-----|
|                 | Ve1 | NSSALFSLQYLESNLAADNMFNVGIP  | 123 |
| Medtr4g017370.1 |     | ASSSLFSLQYLSQSNLALNDFHSMMP  |     |
| Medtr4g017350.1 |     | DSSALFSLQYLSQSNLAFNHFRSVIP  |     |
| Medtr4g017280.1 |     | DSSALFSLQYLSQSNLALNKFNSVIP  |     |
| Medtr5g046350.1 |     | DSSALFSLQ...GLNLAFNKFNVIP   |     |
| GbVe            |     | DSSGLFRFQHLQQLNLAAYNRLMATFP |     |



Functional domain B (continued)

|                 |     |                                                                                                    |     |
|-----------------|-----|----------------------------------------------------------------------------------------------------|-----|
|                 | Ve1 | VG <b>T</b> AN <b>L</b> TN <b>K</b> Y <b>L</b> N <b>L</b> SNAGFV <b>G</b> QIP                      | 147 |
| Medtr4g017370.1 |     | QE <b>L</b> HQ <b>L</b> Q <b>N</b> RY <b>L</b> N <b>F</b> SNAGFQ <b>G</b> QIP                      |     |
| Medtr4g017350.1 |     | QD <b>L</b> HR <b>L</b> H <b>N</b> RY <b>L</b> N <b>L</b> SNAGFK <b>G</b> QVP                      |     |
| Medtr4g017280.1 |     | QA <b>L</b> HK <b>L</b> Q <b>N</b> SY <b>L</b> N <b>L</b> SDAGFD <b>G</b> YVP                      |     |
| Medtr5g046350.1 |     | QA <b>L</b> HK <b>L</b> Q <b>N</b> RY <b>L</b> N <b>L</b> SDAGFEEQVP                               |     |
| GbVe            |     | TGFDK <b>L</b> EN <b>L</b> SY <b>L</b> N <b>L</b> SNAGFT <b>G</b> QIP                              |     |
|                 |     |                                                                                                    |     |
|                 | Ve1 | IT <b>L</b> SR <b>L</b> TR <b>L</b> VT <b>L</b> D <b>L</b> STILPFFDQP                              | 171 |
| Medtr4g017370.1 |     | TE <b>L</b> FH <b>L</b> KR <b>L</b> VT <b>L</b> D <b>L</b> SSSF.TSHHV                              |     |
| Medtr4g017350.1 |     | EE <b>L</b> SH <b>L</b> KR <b>L</b> VI <b>L</b> DFSSKF.ISLQN                                       |     |
| Medtr4g017280.1 |     | IE <b>L</b> SH <b>L</b> TR <b>L</b> VT <b>L</b> D <b>L</b> SSTF.ISHQ <b>S</b>                      |     |
| Medtr5g046350.1 |     | KE <b>L</b> AH <b>L</b> TR <b>L</b> VT <b>L</b> D <b>L</b> SSLI.TSRQN                              |     |
| GbVe            |     | AV <b>L</b> SRMTR <b>L</b> VT <b>L</b> D <b>L</b> S-VSSLLGRS                                       |     |
|                 |     |                                                                                                    |     |
|                 | Ve1 | LKLENPN <b>L</b> SHF <b>L</b> EN <b>L</b> STEL <b>L</b> RE <b>L</b> Y <b>L</b> DGVD <b>L</b> SSQRT | 204 |
| Medtr4g017370.1 |     | LKLENPN <b>L</b> IGMFM <b>N</b> FTD <b>L</b> TK <b>L</b> Y <b>L</b> DGVA <b>L</b> SASGE            |     |
| Medtr4g017350.1 |     | LKLEKPN <b>L</b> IGMLV <b>N</b> LTD <b>L</b> TEL <b>L</b> Y <b>L</b> DGVA <b>L</b> SARGE           |     |
| Medtr4g017280.1 |     | LKLAK <b>N</b> MAILV <b>K</b> N <b>L</b> TN <b>L</b> IE <b>L</b> Y <b>L</b> DGVA <b>L</b> CTSGE    |     |
| Medtr5g046350.1 |     | LKLENPN <b>L</b> IEMLV <b>K</b> N <b>L</b> TD <b>L</b> TEL <b>L</b> Y <b>L</b> DGVA <b>L</b> SSSGD |     |
| GbVe            |     | LTLEKPKLEMLV <b>N</b> LTK <b>L</b> K <b>F</b> L <b>H</b> L <b>D</b> GVN <b>L</b> RATGN             |     |
|                 |     |                                                                                                    |     |
|                 | Ve1 | EWQ <b>S</b> LSLH <b>L</b> PN <b>L</b> TV <b>L</b> SL <b>R</b> DCQ <b>L</b> SG <b>P</b> LD         | 232 |
| Medtr4g017370.1 |     | EWGRSLYP. <b>L</b> GG <b>L</b> RV <b>L</b> SMSSCN <b>L</b> SG <b>P</b> ID                          |     |
| Medtr4g017350.1 |     | EWGHPLSL. <b>L</b> KG <b>L</b> RV <b>L</b> SMSSCN <b>L</b> SG <b>P</b> ID                          |     |
| Medtr4g017280.1 |     | EWGRALSS. <b>L</b> EG <b>L</b> RV <b>L</b> SMSSCN <b>L</b> SG <b>P</b> ID                          |     |
| Medtr5g046350.1 |     | EWGRALSL. <b>L</b> EG <b>V</b> RV <b>L</b> SMSSCN <b>L</b> SG <b>P</b> ID                          |     |
| GbVe            |     | EWCRALS. <b>S</b> ITD <b>L</b> Q <b>V</b> L <b>S</b> MSNCN <b>L</b> SG <b>P</b> ID                 |     |

Functional domain B (continued)

|  |                 |                           |     |
|--|-----------------|---------------------------|-----|
|  | Ve1             | ESISKLHFSLVQLDQNNLSSTVP   | 256 |
|  | Medtr4g017370.1 | SSLARLQSLSVLKLSHNNLSIIVP  |     |
|  | Medtr4g017350.1 | SSLAKLQSLSIVKLSQNKLFTTVP  |     |
|  | Medtr4g017280.1 | SSLVKLQSLSLLKLSHNKLSCIIVP |     |
|  | Medtr5g046350.1 | SSLAKLQSLSVLRLNNNKLSSKVP  |     |
|  | GbVe            | SSISKLRSLSVIRLDNNLSTSV    |     |
|  | Ve1             | EYFANFSMLTTITLGSCNLQSTFP  | 280 |
|  | Medtr4g017370.1 | SSLARLQSLSVLKLSHNNLSIIVP  |     |
|  | Medtr4g017350.1 | SSLAKLQSLSIVKLSQNKLFTTVP  |     |
|  | Medtr4g017280.1 | SSLVKLQSLSLKLSHNKLSCIIVP  |     |
|  | Medtr5g046350.1 | DSFANFSMLTILEISSCGNLGFFP  |     |
|  | GbVe            | EFFAEFPMLTSLHLSTSGLRGGLP  |     |
|  | Ve1             | ERTFQVSVLESVDLSINKLRLGSIP | 305 |
|  | Medtr4g017370.1 | KDIFQIHTLKVLDISYNQNLNGSLP |     |
|  | Medtr4g017350.1 | KDIFQIHTLKVLDMSNNQNLYGSLP |     |
|  | Medtr4g017280.1 | KDIFQIHKLNVLDISDNQNLNGSLP |     |
|  | Medtr5g046350.1 | KEIFQIHTLKVLDISDNQNLSGSLP |     |
|  | GbVe            | AEVLKIPTLQILDLSNNEILEGSFQ |     |
|  | Ve1             | IFFRNGSLRRISLSYTNFSGSLP   | 328 |
|  | Medtr4g017370.1 | DFSTLASLKYLNADTNFSGPLP    |     |
|  | Medtr4g017350.1 | DFPPFAYLHYLNNTNFLGPLP     |     |
|  | Medtr4g017280.1 | DFPPLASLHYLNNTNFSGPLP     |     |
|  | Medtr5g046350.1 | DFSPLASLKYLNADTNFSGPLP    |     |
|  | GbVe            | EFPSNGSLQTLTSGTKFGGQVP    |     |

Functional domain B (continued)

|                 |               |              |        |      |     |
|-----------------|---------------|--------------|--------|------|-----|
| Ve1             | ESISNHQNI     | SRLEI        | SNCNFY | GSIP | 352 |
| Medtr4g017370.1 | NTISNLKHI     | STIDLSHCQFN  | GTLP   |      |     |
| Medtr4g017350.1 | NTISNLKQI     | STIDLSYCKFN  | GTIP   |      |     |
| Medtr4g017280.1 | NTISNLKQI     | STIDLSYQCFN  | GTLP   |      |     |
| Medtr5g046350.1 | NTISNLKHI     | STIDLSHCQFN  | GTLP   |      |     |
| GbVe            | DSIGNLGQI     | TRIEI        | ASCNFS | GPIP |     |
| Ve1             | STMANLRNIGYI  | DFSFNI       | FTGSIP | 376  |     |
| Medtr4g017370.1 | SSMSKITQIVYI  | DLSFNIFT     | GLLP   |      |     |
| Medtr4g017350.1 | NMSSEITQIVYI  | DMSSNLT      | GPLP   |      |     |
| Medtr4g017280.1 | SSMSEITQIVYI  | DMSSNYLT     | GPLP   |      |     |
| Medtr5g046350.1 | SSMSEITQIVYI  | DLSFNIFT     | GLLP   |      |     |
| GbVe            | KAVKKITQIVYI  | DFSSNSF      | GPIP   |      |     |
| Ve1             | YFRLSKKIT     | TYIDLSRNGI   | TGLLS  | 399  |     |
| Medtr4g017370.1 | SLSMSKNIRYI   | SLRNYIS      | GNLP   |      |     |
| Medtr4g017350.1 | SFNMSKNIT     | YLSIFLNHI    | SGDLP  |      |     |
| Medtr4g017280.1 | SFNMSKNIT     | YLSIFLNHI    | SGDLP  |      |     |
| Medtr5g046350.1 | SLR.....      |              |        |      |     |
| GbVe            | SFSSSRNIT     | QINLAYNR     | NGTIH  |      |     |
| Ve1             | RAHFEGISEIVHI | INLGNL       | LSGLP  | 424  |     |
| Medtr4g017370.1 | SNHFEGIINL    | VSIINLGFNSFN | GSVP   |      |     |
| Medtr4g017350.1 | SSHFEGLKNI    | VIVDLGFNYFT  | GNIP   |      |     |
| Medtr4g017280.1 | SSHFEGLQNI    | VSIIDLGFNSFK | GKMP   |      |     |
| Medtr5g046350.1 | .....         | FNSFN        | GSVP   |      |     |
| GbVe            | STDWSVLSNI    | VSIIDLRNNK   | LSGTIP |      |     |

Functional domain B (continued)

|                 |                                                                                                   |     |
|-----------------|---------------------------------------------------------------------------------------------------|-----|
| Ve1             | AYT <b>I</b> FE <b>L</b> PS <b>L</b> QQ <b>L</b> FL <b>I</b> YRNQFV <b>G</b> QVD                  | 448 |
| Medtr4g017370.1 | SSVLK <b>L</b> PC <b>L</b> RE <b>L</b> KL <b>I</b> PYNKLS <b>G</b> ILG                            |     |
| Medtr4g017350.1 | SS <b>L</b> LK <b>L</b> PY <b>L</b> RE <b>L</b> ML <b>I</b> PFNQLS <b>G</b> VLS                   |     |
| Medtr4g017280.1 | SS <b>L</b> LK <b>L</b> PY <b>L</b> RE <b>L</b> KL <b>I</b> PFNQIG <b>L</b> LLV                   |     |
| Medtr5g046350.1 | SSVLK <b>L</b> PC <b>L</b> RE <b>L</b> KL <b>I</b> PYNKLC <b>G</b> ILG                            |     |
| GbVe            | PT <b>L</b> FG <b>I</b> PS <b>L</b> QK <b>I</b> SL <b>I</b> SQNRFN <b>G</b> SLG                   |     |
| Ve1             | EF <b>R</b> NA <b>S</b> SSP <b>L</b> DTVD <b>L</b> TNNH <b>L</b> NG <b>S</b> IP                   | 473 |
| Medtr4g017370.1 | EF <b>H</b> NA <b>S</b> SP <b>L</b> EMID <b>L</b> SN <b>N</b> Y <b>L</b> QG <b>P</b> IP           |     |
| Medtr4g017350.1 | EF <b>D</b> NA <b>S</b> LPV <b>L</b> EMLD <b>L</b> GS <b>N</b> N <b>L</b> QG <b>H</b> VP          |     |
| Medtr4g017280.1 | EF <b>D</b> IAS <b>.</b> SV <b>L</b> EMLD <b>L</b> GS <b>N</b> N <b>L</b> QG <b>H</b> IP          |     |
| Medtr5g046350.1 | EF <b>H</b> NA <b>S</b> SP <b>L</b> EMID <b>L</b> SN <b>N</b> Y <b>L</b> EG <b>P</b> IP           |     |
| GbVe            | DLRGKTTLL <b>L</b> DTLD <b>L</b> SS <b>N</b> M <b>L</b> QG <b>Q</b> FP                            |     |
| Ve1             | KSMF <b>E</b> TER <b>L</b> KVLS <b>L</b> SS <b>N</b> FFR <b>G</b> TVP                             | 497 |
| Medtr4g017370.1 | LSIF <b>N</b> LQT <b>L</b> RFIQ <b>L</b> SS <b>N</b> KFN <b>G</b> TVK                             |     |
| Medtr4g017350.1 | FSLF <b>N</b> LRT <b>L</b> RVFQ <b>L</b> SS <b>N</b> KFN <b>G</b> TIQ                             |     |
| Medtr4g017280.1 | VSVF <b>N</b> L <b>R</b> K <b>L</b> RVLQ <b>L</b> SS <b>N</b> KL <b>N</b> G <b>T</b> IQ           |     |
| Medtr5g046350.1 | LSIF <b>N</b> LQT <b>L</b> RFIQ <b>L</b> SS <b>N</b> KFN <b>G</b> TVK                             |     |
| GbVe            | MFVF <b>E</b> LQ <b>G</b> LKILT <b>L</b> SS <b>N</b> KFS <b>G</b> FIQ                             |     |
| Ve1             | LDL <b>I</b> GR <b>L</b> SN <b>L</b> SR <b>L</b> EL <b>I</b> SYNK <b>L</b> TVDAS                  | 522 |
| Medtr4g017370.1 | LDV <b>I</b> RK <b>L</b> SN <b>L</b> TV <b>L</b> GL <b>S</b> YNN <b>L</b> LVDVN                   |     |
| Medtr4g017350.1 | LN <b>V</b> LQ <b>R</b> L <b>R</b> N <b>L</b> N <b>V</b> L <b>G</b> L <b>S</b> HNN <b>L</b> SIDVN |     |
| Medtr4g017280.1 | LD <b>I</b> IR <b>R</b> L <b>S</b> N <b>L</b> TV <b>L</b> GL <b>S</b> NN <b>F</b> L <b>S</b> IDVN |     |
| Medtr5g046350.1 | LDV <b>I</b> IR <b>R</b> L <b>S</b> N <b>L</b> TV <b>L</b> GL <b>S</b> YNN <b>L</b> LVDVN         |     |
| GbVe            | WTD <b>I</b> Q <b>K</b> L <b>R</b> N <b>L</b> SN <b>L</b> D <b>L</b> SYNN <b>L</b> SIDAT          |     |

Functional domain B (continued)

|                 |              |           |      |    |      |      |       |       |       |   |   |   |   |   |   |   |   |   |   |   |   |     |   |   |   |     |     |
|-----------------|--------------|-----------|------|----|------|------|-------|-------|-------|---|---|---|---|---|---|---|---|---|---|---|---|-----|---|---|---|-----|-----|
| Ve1             | SSN          | STSFT.FPQ | NI   | LK | L    | ASCR | L     | QKFPD | 549   |   |   |   |   |   |   |   |   |   |   |   |   |     |   |   |   |     |     |
| Medtr4g017370.1 | FKYDHN       | MSSFPKMRI | L    | D  | L    | ESCK | L     | LQIPS |       |   |   |   |   |   |   |   |   |   |   |   |   |     |   |   |   |     |     |
| Medtr4g017350.1 | FRDNHDLSPFPE | L         | KD   | L  | M    | L    | ASCK  | L     | KGIPS |   |   |   |   |   |   |   |   |   |   |   |   |     |   |   |   |     |     |
| Medtr4g017280.1 | FRDDHQLSLFRE | L         | RVVQ | L  | ASCN | L    | RGIPS |       |       |   |   |   |   |   |   |   |   |   |   |   |   |     |   |   |   |     |     |
| Medtr5g046350.1 | FKYDHN       | MSSFPKMRI | L    | D  | L    | ESCK | L     | LQIPS |       |   |   |   |   |   |   |   |   |   |   |   |   |     |   |   |   |     |     |
| GbVe            | STN          | SALST.FPN | IT   | L  | K    | L    | ASCN  | L     | KKFPG |   |   |   |   |   |   |   |   |   |   |   |   |     |   |   |   |     |     |
|                 |              |           |      |    |      |      |       |       |       |   |   |   |   |   |   |   |   |   |   |   |   |     |   |   |   |     |     |
| Ve1             | .            | L         | K    | N  | Q    | S    | W     | M     | M     | H | L | D | L | S | D | N | L | G | A | I | P | 571 |   |   |   |     |     |
| Medtr4g017370.1 | F            | L         | K    | N  | Q    | S    | T     | I     | L     | S | L | S | H | M | A | D | N | N | L | E | G | P   | I | P |   |     |     |
| Medtr4g017350.1 | F            | L         | R    | N  | Q    | S    | K     | L     | L     | F | L | D | L | S | S | N | G | L | E | G | P | I   | P |   |   |     |     |
| Medtr4g017280.1 | F            | L         | R    | N  | Q    | S    | K     | L     | L     | F | L | D | L | S | R | N | D | L | E | G | S | I   | P |   |   |     |     |
| Medtr5g046350.1 | F            | L         | K    | N  | Q    | S    | T     | I     | L     | S | L | S | H | M | A | D | N | N | L | E | G | P   | I | P |   |     |     |
| GbVe            | F            | L         | K    | T  | Q    | V    | K     | L     | N     | H | L | D | L | S | K | N | Q | M | S | L | E | I   | P |   |   |     |     |
|                 |              |           |      |    |      |      |       |       |       |   |   |   |   |   |   |   |   |   |   |   |   |     |   |   |   |     |     |
| Ve1             | N            | W         | I    | W  | G    | I    | G     | G     | G     | G | L | T | H | L | N | L | S | F | N | Q | L | -E  | Y | V | E | Q   | 597 |
| Medtr4g017370.1 | K            | W         | I    | W  | Q    | L    | E     | S     | .     | . | L | V | S | L | N | L | S | H | N | Y | F | T   | G | L | E | E   | S   |
| Medtr4g017350.1 | N            | W         | I    | W  | K    | L    | E     | S     | .     | . | L | L | S | L | N | L | S | K | N | S | L | T   | N | F | E | E   | S   |
| Medtr4g017280.1 | N            | W         | I    | W  | K    | H    | E     | S     | .     | . | L | L | N | L | N | L | S | K | N | S | L | T   | N | F | E | E   | T   |
| Medtr5g046350.1 | K            | W         | I    | W  | Q    | L    | E     | S     | .     | . | L | V | S | L | N | L | S | H | N | Y | F | T   | G | L | E | E   | S   |
| GbVe            | N            | W         | W    | E  | I    | K    | N     | .     | .     | L | A | Y | L | N | L | S | Q | N | S | L | M | K   | F | E | G | P   |     |
|                 |              |           |      |    |      |      |       |       |       |   |   |   |   |   |   |   |   |   |   |   |   |     |   |   |   |     |     |
| Ve1             | .            | Y         | T    | A  | S    | S    | N     | L     | V     | V | L | D | L | H | S | N | R | L | K | G | D | L   | L | I | P | 622 |     |
| Medtr4g017370.1 | F            | S         | N    | F  | S    | S    | N     | L     | N     | T | V | D | L | S | Y | N | N | L | Q | G | P | I   | P | L | V |     |     |
| Medtr4g017350.1 | I            | W         | N    | L  | S    | S    | N     | L     | Y     | L | V | D | L | S | F | N | K | L | Q | G | P | I   | S | F | I |     |     |
| Medtr4g017280.1 | S            | W         | N    | L  | S    | S    | N     | L     | Y     | M | V | D | L | S | F | N | R | L | Q | G | P | I   | S | F | I |     |     |
| Medtr5g046350.1 | F            | S         | N    | F  | S    | S    | N     | L     | N     | T | V | D | L | S | Y | N | N | L | Q | G | P | I   | P | L | V |     |     |
| GbVe            | F            | L         | S    | I  | T    | S    | T     | L     | T     | V | V | D | L | H | G | N | Q | L | Q | G | Q | I   | D | R | L |     |     |

Functional domain B (continued)

|                 |      |                                                                                                   |     |
|-----------------|------|---------------------------------------------------------------------------------------------------|-----|
|                 | Ve1  | PCTA <b>L</b> Y <b>V</b> NYSSNN <b>L</b> N <b>S</b> <b>L</b> PTDIG                                | 645 |
| Medtr4g017370.1 |      | PKYAA <b>L</b> LDYSSNNFSS <b>L</b> PPDIG                                                          |     |
| Medtr4g017350.1 |      | PKYAFYLDYSSNK <b>L</b> SS <b>L</b> HPDIG                                                          |     |
| Medtr4g017280.1 |      | PKHAFYLDYSSNK <b>L</b> SSIVQPDIG                                                                  |     |
| Medtr5g046350.1 |      | PKYAA <b>L</b> LDYSSNNFSS <b>L</b> RPDIG                                                          |     |
|                 | GbVe | PQYATYLDYSRNNFSS <b>V</b> LPRDIG                                                                  |     |
|                 |      |                                                                                                   |     |
|                 | Ve1  | KS <b>L</b> GFASFFSVANNG <b>L</b> TCIIP                                                           | 666 |
| Medtr4g017370.1 |      | NH <b>L</b> PYMTFMFLSN <b>N</b> K <b>F</b> Q <b>G</b> QIH                                         |     |
| Medtr4g017350.1 |      | NY <b>L</b> PAINILF <b>L</b> SN <b>S</b> FK <b>G</b> GEID                                         |     |
| Medtr4g017280.1 |      | NY <b>L</b> PAINILF <b>L</b> SN <b>S</b> FK <b>G</b> GEID                                         |     |
| Medtr5g046350.1 |      | NH <b>L</b> PYMTFMFLSN <b>N</b> K <b>F</b> Q <b>G</b> QIH                                         |     |
|                 | GbVe | DF <b>L</b> QFAYFFSISD <b>N</b> N <b>F</b> H <b>G</b> SIP                                         |     |
|                 |      |                                                                                                   |     |
|                 | Ve1  | ES <b>L</b> CNCSY <b>L</b> Q <b>V</b> LDFSN <b>N</b> A <b>L</b> SGTIP                             | 690 |
| Medtr4g017370.1 |      | DSFC <b>N</b> ATS <b>L</b> R <b>L</b> LDSLH <b>N</b> N <b>F</b> L <b>G</b> KIP                    |     |
| Medtr4g017350.1 |      | ES <b>L</b> C <b>N</b> ASS <b>L</b> R <b>L</b> LDSY <b>N</b> N <b>F</b> D <b>G</b> KIP            |     |
| Medtr4g017280.1 |      | ES <b>L</b> C <b>N</b> ASY <b>L</b> R <b>L</b> LDSY <b>N</b> N <b>F</b> D <b>G</b> KIP            |     |
| Medtr5g046350.1 |      | DSFC <b>N</b> ASS <b>L</b> R <b>L</b> LDSLH <b>N</b> N <b>F</b> V <b>G</b> TIP                    |     |
|                 | GbVe | ES <b>L</b> CKSSY <b>L</b> Q <b>V</b> LDSL <b>N</b> NS <b>L</b> SGSIP                             |     |
|                 |      |                                                                                                   |     |
|                 | Ve1  | PCL <b>L</b> EYSTK <b>L</b> GV <b>L</b> N <b>L</b> GNN <b>K</b> L <b>N</b> GVIP                   | 715 |
| Medtr4g017370.1 |      | KCFEALSS <b>N</b> L <b>R</b> V <b>L</b> N <b>F</b> GG <b>N</b> K <b>L</b> R <b>G</b> QIP          |     |
| Medtr4g017350.1 |      | KCFATLSS <b>K</b> L <b>R</b> M <b>L</b> N <b>F</b> GG <b>N</b> K <b>L</b> H <b>G</b> HIP          |     |
| Medtr4g017280.1 |      | KCFATLSS <b>R</b> L <b>L</b> M <b>L</b> N <b>F</b> EG <b>N</b> K <b>L</b> H <b>G</b> HIP          |     |
| Medtr5g046350.1 |      | KCFEALSS <b>S</b> L <b>R</b> V <b>L</b> N <b>F</b> GG <b>N</b> K <b>L</b> R <b>G</b> QIP          |     |
|                 | GbVe | ECL <b>L</b> QMSV <b>S</b> L <b>G</b> V <b>L</b> N <b>L</b> RR <b>N</b> N <b>L</b> TC <b>N</b> IS |     |

Functional domain B (continued)

|  |                 |                             |     |
|--|-----------------|-----------------------------|-----|
|  | Ve1             | DSFSIG.CALQTLIDLSANNIQRLP   | 739 |
|  | Medtr4g017370.1 | SSMFPNLCAIRFVDLNDNLGGPIP    |     |
|  | Medtr4g017350.1 | DTISPNSCALRYLNLNDNLDCSIP    |     |
|  | Medtr4g017280.1 | DIISPNSCALRYLNLNDNLNGSIP    |     |
|  | Medtr5g046350.1 | SSMFPNLCAIRFVDLNDNLGGPIP    |     |
|  | GbVe            | DTFPEN.CLIQTLVLRNRLRQKVP    |     |
|  |                 |                             |     |
|  | Ve1             | KSLVNCCKLLEVLNVGNRLVDHFP    | 763 |
|  | Medtr4g017370.1 | KSLINCKELQVLNLGKNALTGRFP    |     |
|  | Medtr4g017350.1 | KSLVNCNKLQVLNLGNFLSDRFP     |     |
|  | Medtr4g017280.1 | KSLVNCNKLQVLNLGNFLSDRFP     |     |
|  | Medtr5g046350.1 | TSLINCKELQVLNLEKNALTGRFP    |     |
|  | GbVe            | KSLVSCCKLLEVLDLGNQLNDTFP    |     |
|  |                 |                             |     |
|  | Ve1             | CMLRNSNSLRVLRVRSNKFYGNLM    | 787 |
|  | Medtr4g017370.1 | CFLSKIPTLRIMVLRSNKLHGSIR    |     |
|  | Medtr4g017350.1 | CFLSNISMLRIMVLRSNKMHGSIG    |     |
|  | Medtr4g017280.1 | CFLSNISTLRIMVLRSNKLHGSIG    |     |
|  | Medtr5g046350.1 | CFLSKIPTLRIMVLRSNKLHGSIR    |     |
|  | GbVe            | CHLKNISSLRVLRVLRGNKFNQNVH   |     |
|  |                 |                             |     |
|  | Ve1             | CDVTRNSWQNLQIIDLASNNFTGVLN  | 813 |
|  | Medtr4g017370.1 | CPNSTGYWKMHLIVDLARNNFSGMIS  |     |
|  | Medtr4g017350.1 | CPNSTGDWEMHLIVDLASNNFNGTIP  |     |
|  | Medtr4g017280.1 | CPTRTGDWKMHLIVDLASNNLNGRIP  |     |
|  | Medtr5g046350.1 | CPNSTGYWKMHLIVDLACNNFSGMIS  |     |
|  | GbVe            | CS.ERSPWPMQLIVDLSSNSFSGR LH |     |

Functional domain B (continued)

|                 |     |                            |     |
|-----------------|-----|----------------------------|-----|
|                 | Ve1 | AEFFSNWRGMMVADDYVETGRNHIQ  | 838 |
| Medtr4g017370.1 |     | SALLNSWQAMMRDEDVVGPEFGSLF  |     |
| Medtr4g017350.1 |     | VALLNSWKAMMRDEGVLRKELGHLF  |     |
| Medtr4g017280.1 |     | VSLLNSWKAMMRDEDVVGTELGHFLF |     |
| Medtr5g046350.1 |     | SALLNSWQAMMRDEDVVGPEFGSLF  |     |
| GbVe            |     | EACLSTWKAMRAAESETLSELNHLQ  |     |

867

Ve1YEFLQ.....LSKLY.....YQDTVTLTIKGMELVVKI  
 .70 FEVYDNYHQMGFKDVVRMMEKFCQVAQQLLNMSHSDLYQVFSDRTAEHVDLGRYQESIIIVNKGHQMKLVKV  
 .50 FDIDDNFHPMSFKALLPDLDKHVMNLIKLLANMSRSIIDQEY...AKFKILARYQDTIIIVNKGQQMNVVKI  
 .80 FDIDDNFHPMSFKAMPLALDKRVSTNLIPFLENMSRSIIDQEY...AKLKILARYQVSINIVNKGHQMKLVKI  
 350 FEVYDNYHQMGFKDVVRMMEKFCQVQTQLLNMSHSDLYQVFSDRTAEHVDLGRYQESIIIVNKGHQMKLVKV  
 GbVe FKVLK.....LNQFY.....YQDAITVTMKGLELELLKI

|                 |     |                       |     |
|-----------------|-----|-----------------------|-----|
|                 | Ve1 | LRVFTSIRDFSSNRFGAIP   | 886 |
| Medtr4g017370.1 |     | QTAFTYVDMSSNYLEGQIP   |     |
| Medtr4g017350.1 |     | QSTFTYVDMSSNYLGGPIP   |     |
| Medtr4g017280.1 |     | QSALTYVDMSSNYLEGPIP   |     |
| Medtr5g046350.1 |     | QTAFTYVDMSSNYLEGQIP   |     |
| GbVe            |     | LRTVFTSIRDISRNNFEGPIP |     |

|                 |     |                            |     |
|-----------------|-----|----------------------------|-----|
|                 | Ve1 | DATIGNLSSLYVNLNLSHNALEGP   | 910 |
| Medtr4g017370.1 |     | DELQMFKALMALNLSHNAITGHIP   |     |
| Medtr4g017350.1 |     | DVLMRFKALNALNLSHNAITGHIP   |     |
| Medtr4g017280.1 |     | NELQMFKALNALNLSHNAITGHIP   |     |
| Medtr5g046350.1 |     | DELQMFKALMALNLSHNAITGHIP   |     |
| GbVe            |     | EVIIGTFKALYVNLNLSHNAFTGSIP |     |



**Functional domain B (continued)**

|  |                 |                                        |     |
|--|-----------------|----------------------------------------|-----|
|  | Ve1             | KSIGKIQMESLDSTNHSGEIP                  | 934 |
|  | Medtr4g017370.1 | SSVENIKHLECMDISNNSINGEIP               |     |
|  | Medtr4g017350.1 | SSVENIKHLESMDISNNSINGEIP               |     |
|  | Medtr4g017280.1 | SLVGNIKNLESMDISNNSINGEIP               |     |
|  | Medtr5g046350.1 | SSVENIKHLESMDISNNSINGEIP               |     |
|  | GbVe            | PSLGNISQIESLDISNSFDGEIP                |     |
|  | Ve1             | SEIASITFLAALNLSFNKIFGKIP               | 958 |
|  | Medtr4g017370.1 | QGLSSISFLAYMNLISFNHIVGRIP              |     |
|  | Medtr4g017350.1 | QGLSSISFLAYMNLISFNHIVGRIP              |     |
|  | Medtr4g017280.1 | QELSSISFLAYMNLISFNHIVGRIP              |     |
|  | Medtr5g046350.1 | QGLSSISFLAYMNLISFNHIVGRIP              |     |
|  | GbVe            | IQLANLNFIISFLNVSNNKIEGQIP              |     |
|  | Ve1             | STNQFQTFADSFEFGNSGLCGPLINNSCQSNGL...SA | 992 |
|  | Medtr4g017370.1 | LGTQIQSFDVDSFKGNEGICGPPITTCDDGGVQGLP   |     |
|  | Medtr4g017350.1 | LGTQIQTFDVDSFAGNEGICGPPITKICE.....PP   |     |
|  | Medtr4g017280.1 | LGTQIQTFDVDSFEFGNEGICGPPITKICE.....LP  |     |
|  | Medtr5g046350.1 | LGTQIQSFDVDSFKGNEGICGPPITTCDDGGVQGLP   |     |
|  | GbVe            | RSTQIQSFSEASFENKGLCGPLITDCV.NGL...TS   |     |

**Functional domain C**

|  |                 |                    |      |
|--|-----------------|--------------------|------|
|  | Ve1             | SESLPPPTPLPDSDEWE  | 1010 |
|  | Medtr4g017370.1 | PPASELSPCHNDSSIDWN |      |
|  | Medtr4g017350.1 | QPASETPHSQNESFVEWS |      |
|  | Medtr4g017280.1 | QSASETPHSQNESFVEWS |      |
|  | Medtr5g046350.1 | PPASELSPCHNNSIDWN  |      |
|  | GbVe            | PKPRTTQEFQPADEFDQ  |      |

|                            |                 |                        |      |
|----------------------------|-----------------|------------------------|------|
| <b>Functional domain D</b> | Ve1             | FIFAAVGYIVGAANTISVWVF  | 1031 |
|                            | Medtr4g017370.1 | FLSVELGFIFGLGIFILPLVC  |      |
|                            | Medtr4g017350.1 | FISIELGFFFVGFVFI LPVFC |      |
|                            | Medtr4g017280.1 | FISIELGFLFGVGFILPVFC   |      |
|                            | Medtr5g046350.1 | FLSVELGFIFGLGIFILPLVC  |      |
|                            | GbVe            | FIFIGVGFVGAALFVAPLIF   |      |

|                            |                 |                                            |      |
|----------------------------|-----------------|--------------------------------------------|------|
| <b>Functional domain E</b> | Ve1             | YKPVKKWFDKHMEKCLLWFSRK                     | 1053 |
|                            | Medtr4g017370.1 | LMKWRLWYSNHADEMLHRFIPQLDFVYEQHEGKRCRSLRWRY |      |
|                            | Medtr4g017350.1 | WKKLRLWYSKHVDEMLYRFIPRLDFVYEQHEGKRYKTLKWMY |      |
|                            | Medtr4g017280.1 | WKKLRLWYSKHVDEMLYRFIPRLDFVYEQHEGKRYKTLKWMY |      |
|                            | Medtr5g046350.1 | LMKWRLWYSNRADEMLHRFIPQLDFVYEQHEGKRCRSLRWRY |      |
|                            | GbVe            | WKTASKWVDEIVDKILEVVLPKLGRYTCYDGRKVDENLE    |      |

**Fig. S7. Identification of four *Medicago truncatula* paralogs putatively orthologous to *Ve Verticillium* resistance genes.**

**A** Phylogenetic tree comparing MtVe candidates proteins to functionally validated Ve homologs in other plant species. **B** Percentage of amino-acid similarities of four MtVe candidates proteins deduced from cDNA sequence with functionally validated Ve homologs in other plant species. **C** Conservation of functional protein domain in the primary structure of Ve1, GbVe and four MtVe candidates proteins. Primary structure of the Ve1, GbVe and our four MtVe candidates proteins are deduced from cDNA sequence. The Ve polypeptides have been divided into domains A–E by Kawchuk et al. (2001) and alignments are drawn to comply with this classification. Highlighted are the hydrophobic amino acids (purple) of the putative signal peptide domain A and membrane-associated domain D; conserved L/I (red), G (green), and potential Nglycosylation sites (blue) within the LRR domain B; neutral and acidic amino acids (gray) of domain C; and neutral and basic amino acids (yellow) of domain E.

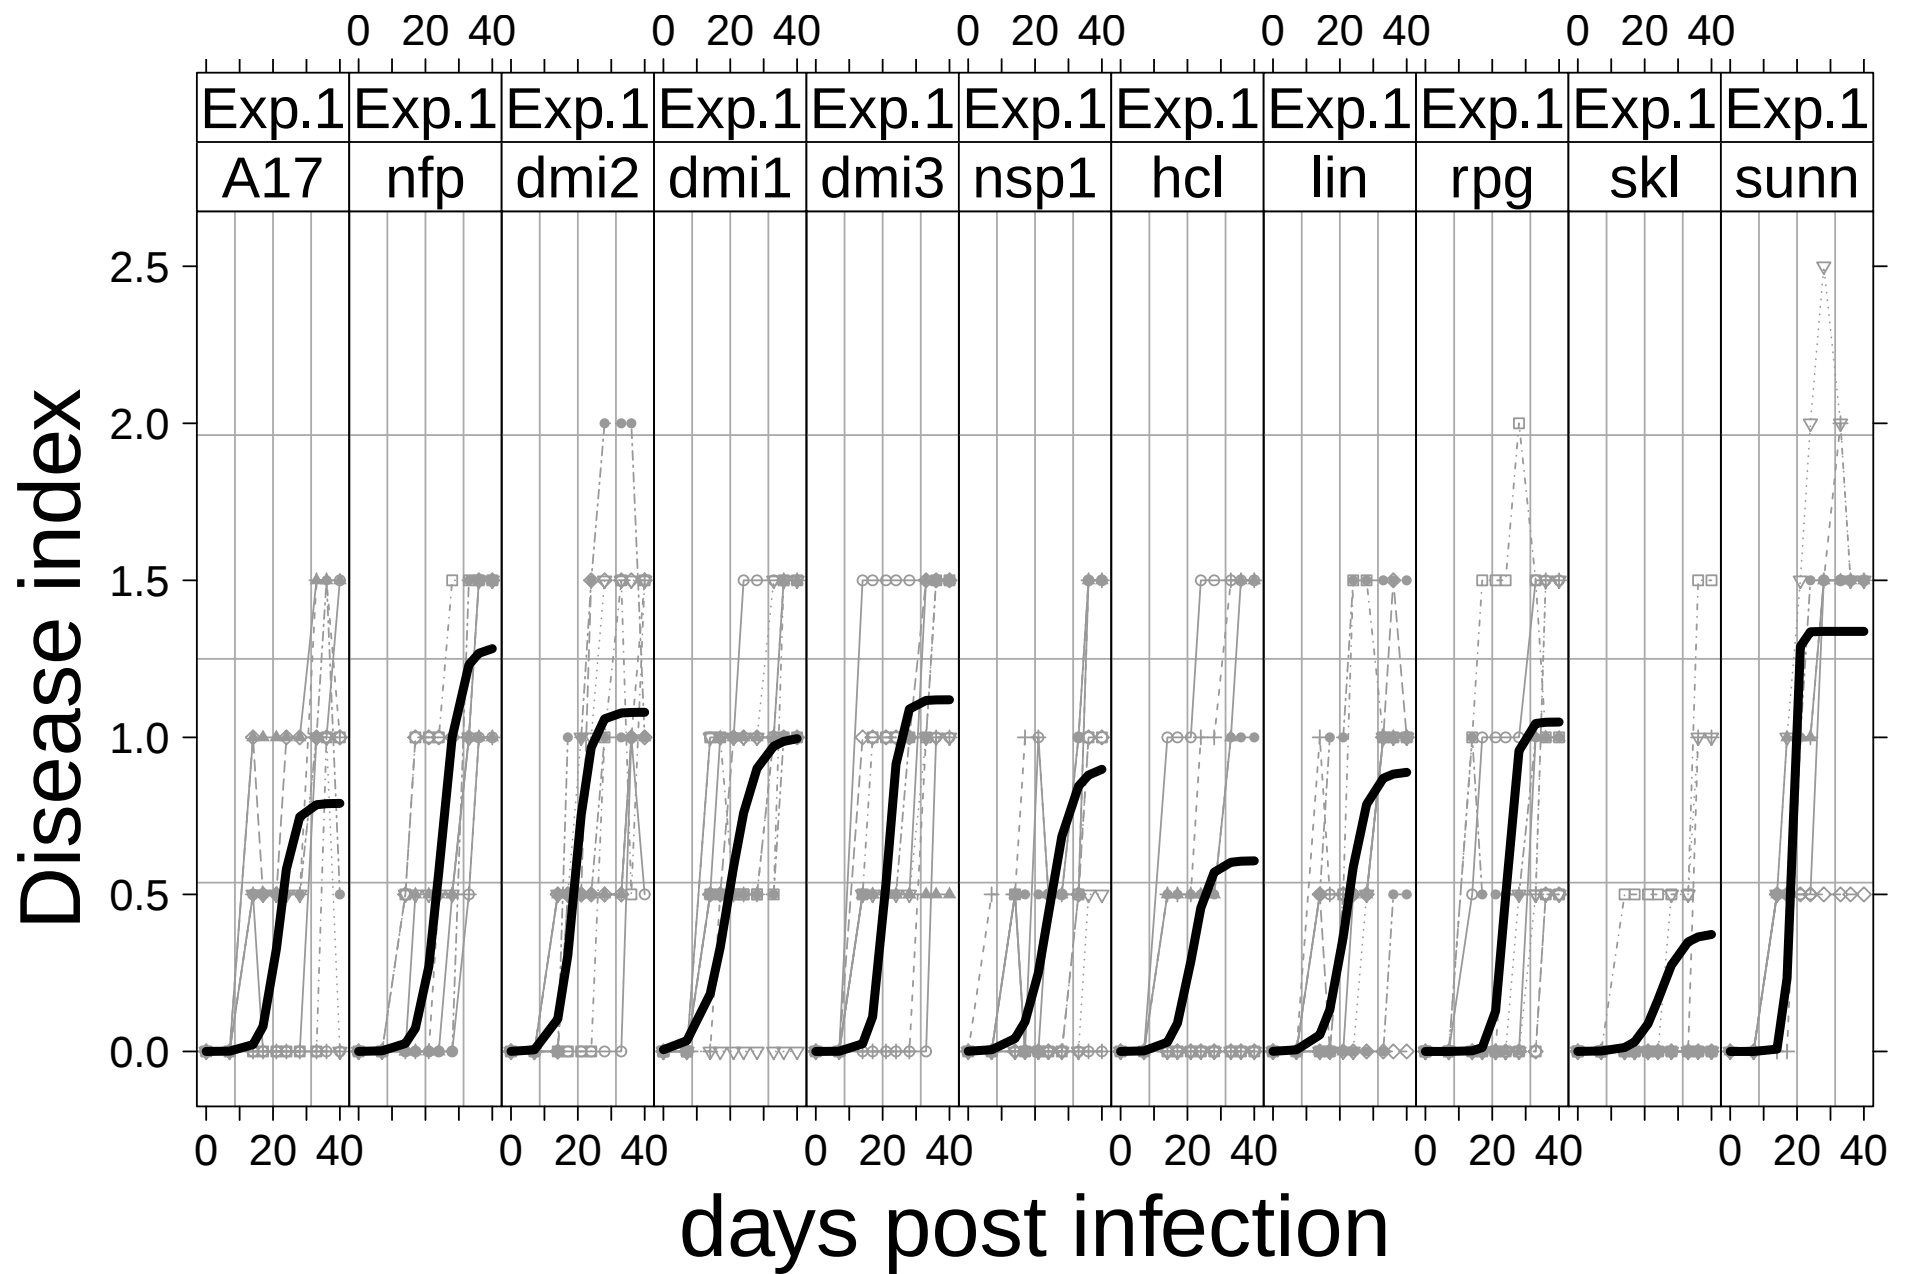

**Fig. S8.** Response to *Verticillium albo-atrum* inoculation of *Medicago truncatula* nodulation mutants. Mutants are in the Jemalong-A17 (resistant) genetic background. Disease symptoms were scored with eight to ten plants per inoculation. F83005.5 was used as susceptibility control. Similar results were obtained in three independent experiments.

**Table S1:** Variance analysis for functional disease parameters in the Core Collection 32, including Jemalong-A17.

|      |              | Disease curve modelling |                       |                         |                                 |
|------|--------------|-------------------------|-----------------------|-------------------------|---------------------------------|
|      |              | df                      | maximum disease index | time to 50% disease [d] | rate of disease progression [d] |
| CC32 | Biol. repeat | 1                       | NS                    | <.0001                  | NS                              |
|      | Genotype     | 32                      | <.0001                | 0.0213                  | NS                              |

NS : non significant at alpha=1%
